# Supplementary material
Source: publisher figshare collection journal article supplement (https://tandf.figshare.com/ndownloader/files/18049721)
Supplement: Supplementary file 1 [file 18049721]

# Supplementary Information 1.

Two-way ANOVA statistics for shoot biomass and nutrients amounts (N, P, Ca, Mg) according to soil origins (Imerintsiatosika/Ivory) and rice cultivars (Chhomrong Dhan and Nerica 4) after 57 days of growth under adequate fertilization level (AFL) and without fertilization (Ctl) treatments.

| **AFL** |  |  |  |  |  |  |  |  |
| --- | --- | --- | --- | --- | --- | --- | --- | --- |
|  | Soil | |  | Cultivar | |  | Soil x Cultivar | |
|  | F value | p value |  | F value | p value |  | F value | p value |
| Shoot biomass | 0.007 | 0.932 |  | 0.796 | 0.383 |  | 0.027 | 0.871 |
| N amounts | 0.413 | 0.53847 |  | 20.44 | 0.001** |  | 0.187 | 0.677 |
| P amounts | 6.42 | 0.03* |  | 17.07 | 0.003** |  | 1.81 | 0.21 |
| Ca amounts | 0.09 | 0.76 |  | 0.83 | 0.39 |  | 0.28 | 0.61 |
| Mg amounts | 20.51 | 0.001** |  | 98.27 | <0.0001*** |  | 5.25 | 0.05 |
|  |  |  |  |  |  |  |  |  |
| **Ctl** |  |  |  |  |  |  |  |  |
|  | Soil | |  | Cultivar | |  | Soil x Cultivar | |
|  | F value | p value |  | F value | p value |  | F value | p value |
| Shoot biomass | 13.44 | 0.01** |  | 1.78 | 0.21 |  | 1.00 | 0.35 |
| N amounts | 19.94 | 0.002** |  | 4.3 | 0.07 |  | 2.81 | 0.13 |
| P amounts | 102.4 | <0.0001*** |  | 10 | 0.01** |  | 10 | 0.01** |
| Ca amounts | 26.46 | <0.001*** |  | 0.81 | 0.39 |  | 0.007 | 0.94 |
| Mg amounts | 49 | 0.0001*** |  | 30.25 | 0.0005*** |  | 12.25 | 0.008** |

* P<0.05; ** P<0.01; *** P< 0.001
